# Supplementary material for: A rapid and simple protocol for concentration of SARS-CoV-2 from sewage
Source: bioRxiv or medRxiv preprint supplement (doi:10.1101/2021.05.27.21257934), 2021-05-30
Supplement: Supplementary file [file media-1.pdf]

## A rapid and simple protocol for concentration of SARS-CoV-2 from sewage

Diana P. Wehrendt<sup>a,b</sup>, Mariana G. Massó<sup>c</sup>, Adrián Gonzales Machuca<sup>c</sup>, Claudia V. Vargas<sup>d</sup>, Melina E. Barrios<sup>b,e</sup>, Josefina Campos<sup>g</sup>, Damián Costamagna<sup>h</sup>, Luis Bruzzone<sup>i</sup>, Daniel M. Cisterna<sup>g</sup>, Néstor Gabriel Iglesias<sup>b,j</sup>, Viviana A. Mbayed<sup>b,e,f</sup>, Elsa Baumeister<sup>k</sup>, Daniela Centrón<sup>b,c</sup>, María Paula Quiroga<sup>b,c</sup>, Leonardo Erijman<sup>a,b,l\*</sup>

### Supplemental Material

Table S1: Effect of storage during 7 days at 4°C of concentrated sewage samples on RT-qPCR detection of SARS-CoV-2

| Sample ID | Target gene    |               |                |               |
|-----------|----------------|---------------|----------------|---------------|
|           | N              |               | Orf1ab         |               |
|           | Before storage | After storage | Before storage | After storage |
| AK31      | 31,18          | 33,24         | 32,52          | 38,89         |
| AK32      | 31,33          | 33,27         | 32,10          | 36,72         |
| SF29      | 30,84          | 30,59         | 31,24          | 30,80         |
| SF31      | 35,37          | 34,1          | 35,85          | n.d.          |
| SF32      | 34,52          | n.d.          | 44,26          | 37,67         |
| SP29      | 31,87          | 30,5          | 33,88          | 31,48         |
| SP32      | 35,94          | 35,2          | n.d.           | n.d.          |
| SV31      | 33,63          | 33,06         | n.d.           | 34,23         |
| SV32      | 29,76          | 30,3          | 31,05          | 31,91         |

n.d.: non- detection.
